# Supplementary material
Source: Research Square preprint supplement (doi:10.21203/rs.3.rs-9259338/v1)
Supplement: Supplementary file 1 [file a63542cd4f119d4b446e0d8a.docx]

**Supplementary:**

**Supplementary Figure S1.**
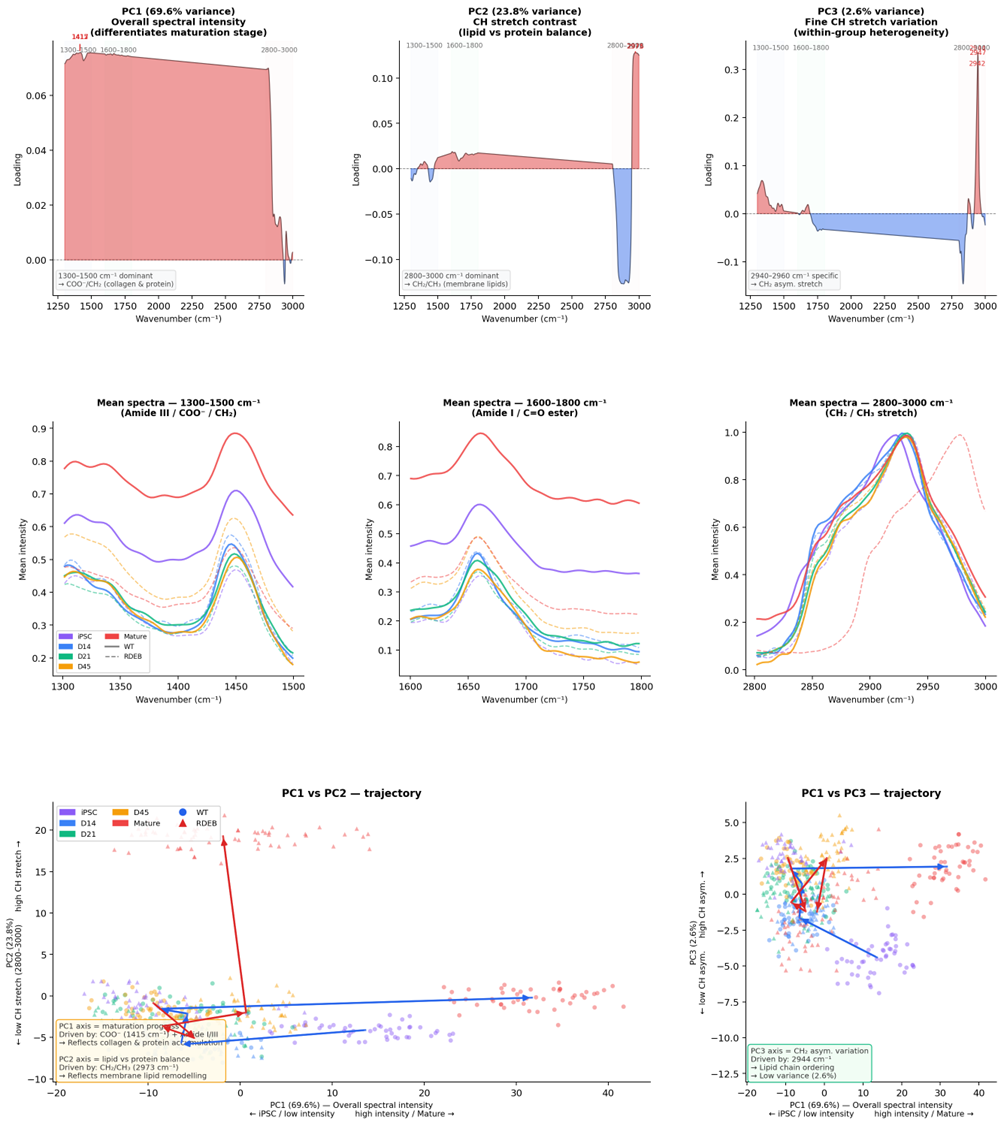


**Figure S1. Principal-component loadings, window-specific mean spectra, and annotated genotype trajectories underlying Raman differentiation analysis.**

(A–C) Loading profiles for PC1–PC3 across the concatenated 1300–1500, 1600–1800, and 2800–3000 cm⁻¹ windows. PC1 captures broad stage-associated spectral intensity, PC2 emphasizes contrast between the CH-stretch region and lower-wavenumber protein-associated bands, and PC3 highlights finer variation within the high-wavenumber CH-stretch region. (D–F) Mean spectra for iPSC, D14, D21, D45, and Mature states in the 1300–1500, 1600–1800, and 2800–3000 cm⁻¹ windows. Solid and dashed traces distinguish WT and RDEB as labeled in the figure. (G,H) Annotated trajectory plots in PC1–PC2 and PC1–PC3 space showing stage-colored spectra and genotype-specific centroid paths, with text boxes summarizing the dominant biochemical interpretation of each component axis.

**Supplementary Figure S2.**
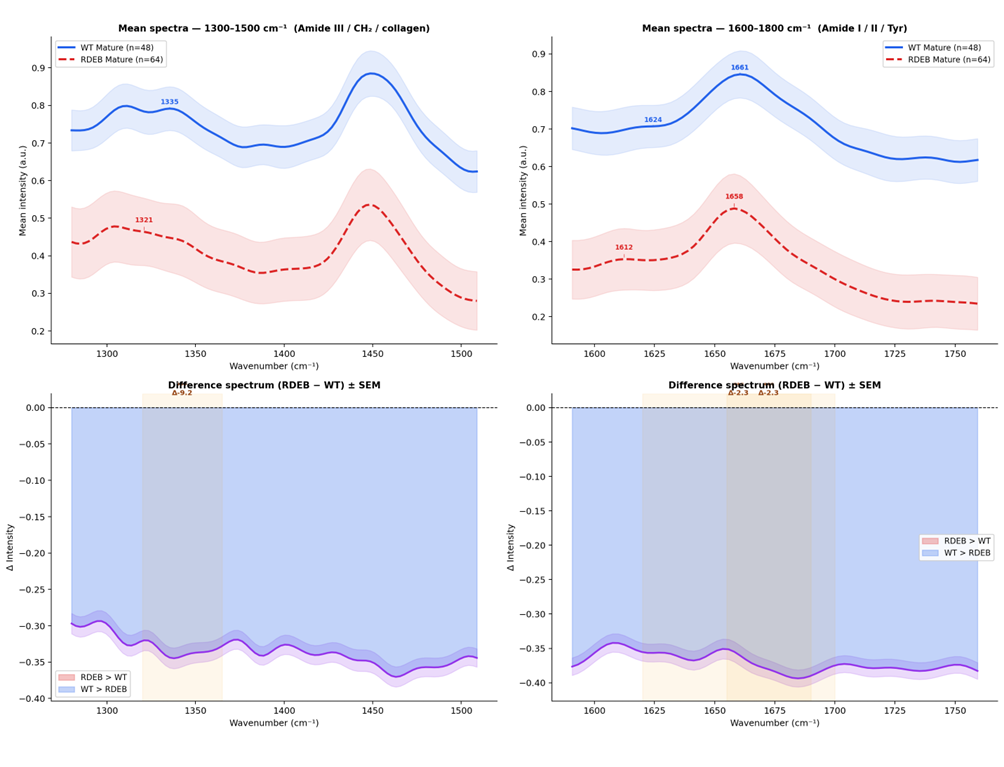
 **Supplementary Figure S2. Mature-stage WT and RDEB spectra and difference spectra in protein-associated Raman windows.**

(A,B) Mean mature spectra for WT and RDEB in the 1300–1500 and 1600–1800 cm⁻¹ regions, with labeled peak positions and shaded variability bands. WT mature spectra (n=48) and RDEB mature spectra (n=64) are shown as indicated. (C,D) Difference spectra (RDEB – WT) ± SEM across the same windows, highlighting the broad reduction of mature RDEB signal relative to WT and the subregions surrounding the major shifted protein-associated bands.

**Supplementary Figure S3.
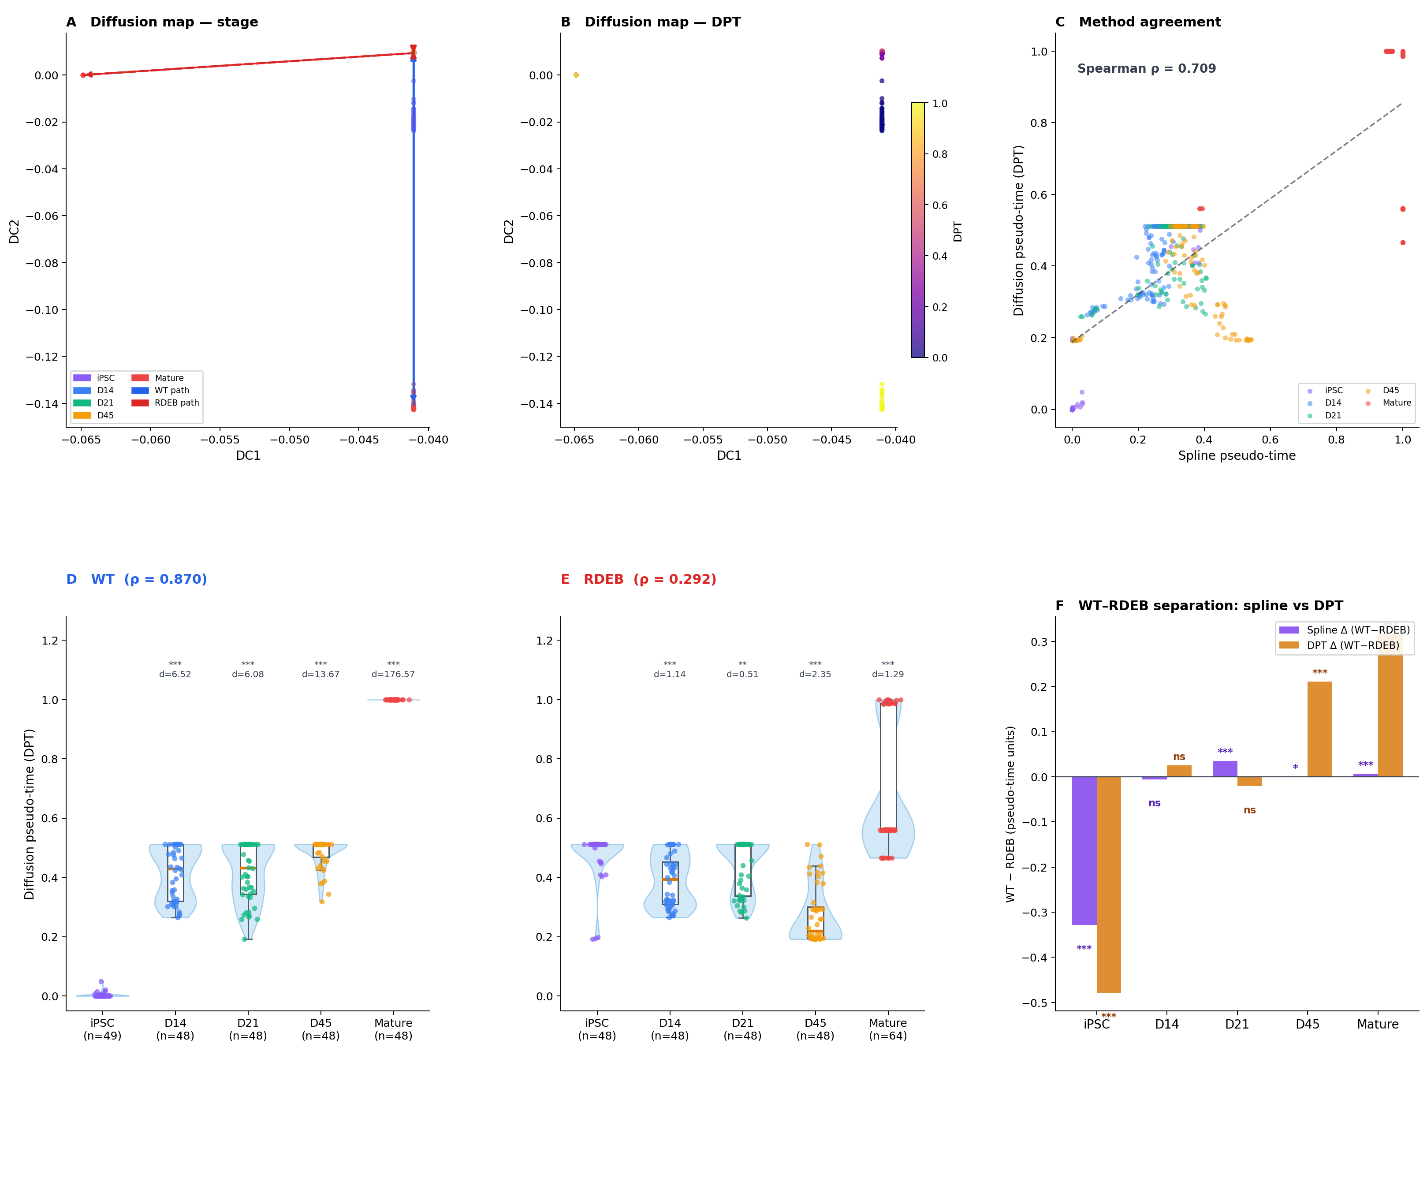
**

**Supplementary Figure S3. Diffusion map and diffusion pseudo-time analysis.** Diffusion map and diffusion pseudo-time (DPT) analysis of 497 filtered Raman spectra (WT n=241, RDEB n=256) as a complementary validation of the spline-based trajectory. (A) Diffusion map embedding in DC1–DC2 space, colored by differentiation stage; lines connect stage centroids for WT (solid) and RDEB (dashed). (B) Diffusion map embedding colored by DPT value. (C) Spearman correlation between spline pseudo-time and DPT (ρ=0.709), colored by stage. (D–E) DPT distributions per differentiation stage for WT (D, ρ=0.870) and RDEB (E, ρ=0.292), with significance vs iPSC baseline (Mann–Whitney U; Cohen's d below brackets). ((F) Mean WT−RDEB pseudo-time separation per stage for spline (purple) and DPT (amber); bars show mean WT minus mean RDEB, significance from Mann−Whitney U test. The substantially lower DPT stage association in RDEB (ρ=0.292) compared with WT (ρ=0.870) reveals method-dependent behaviour that is not apparent from the overall agreement (ρ=0.709). In WT, spline and diffusion estimates converge (ρ=0.926 vs 0.870), indicating a robust monotonic trajectory. In RDEB, the larger divergence (ρ=0.595 vs 0.292) indicates that the spline estimate is partly anchored by the imposed stage order rather than an intrinsically ordered spectral progression, consistent with a biochemically aberrant differentiation path in RDEB.

**Supplementary table**

**Supplementary Table S1. Stage-specific WT versus RDEB Raman band comparisons.**

Stage-specific comparisons for Raman-derived metrics across the differentiation series, including the 1300–1500, 1600–1800, and 2800–3000 cm⁻¹ mean intensity windows and the 2800–3000/1600–1800 lipid/protein ratio. Suggested columns: Stage; Metric; WT (mean ± SD); RDEB (mean ± SD); p-value; Cohen’s d.

| **Stage** | **Metric** | **WT (mean ± SD)** | **RDEB (mean ± SD)** | **n_WT** | **n_RDEB** | **p-value** | **Cohen's d** |
| --- | --- | --- | --- | --- | --- | --- | --- |
| iPSC | 1300–1500 cm⁻¹ (CH₂/CH₃ bending) | 0.565 ± 0.069 | 0.348 ± 0.060 | 49 | 48 | **4.91e-16** | 3.36 |
|  | 1600–1800 cm⁻¹ (Amide I / protein) | 0.442 ± 0.060 | 0.167 ± 0.049 | 49 | 48 | **2.84e-17** | 5.02 |
|  | 2800–3000 cm⁻¹ (CH stretching / lipid) | 0.561 ± 0.012 | 0.517 ± 0.019 | 49 | 48 | **1.06e-15** | 2.74 |
|  | 2800–3000/1600–1800 (lipid/protein ratio) | 1.290 ± 0.170 | 3.292 ± 0.714 | 49 | 48 | **2.84e-17** | -3.88 |
| D14 | 1300–1500 cm⁻¹ (CH₂/CH₃ bending) | 0.367 ± 0.047 | 0.374 ± 0.040 | 48 | 41 | 3.42e-01 | -0.18 |
|  | 1600–1800 cm⁻¹ (Amide I / protein) | 0.202 ± 0.040 | 0.215 ± 0.027 | 48 | 41 | 5.26e-02 | -0.37 |
|  | 2800–3000 cm⁻¹ (CH stretching / lipid) | 0.553 ± 0.014 | 0.539 ± 0.015 | 48 | 41 | **1.83e-04** | 0.94 |
|  | 2800–3000/1600–1800 (lipid/protein ratio) | 2.835 ± 0.523 | 2.542 ± 0.314 | 48 | 41 | **6.85e-03** | 0.67 |
| D21 | 1300–1500 cm⁻¹ (CH₂/CH₃ bending) | 0.375 ± 0.056 | 0.342 ± 0.067 | 48 | 48 | **1.85e-02** | 0.54 |
|  | 1600–1800 cm⁻¹ (Amide I / protein) | 0.220 ± 0.054 | 0.183 ± 0.053 | 48 | 48 | **1.96e-03** | 0.70 |
|  | 2800–3000 cm⁻¹ (CH stretching / lipid) | 0.529 ± 0.022 | 0.538 ± 0.024 | 48 | 48 | **1.34e-02** | -0.42 |
|  | 2800–3000/1600–1800 (lipid/protein ratio) | 2.542 ± 0.600 | 3.204 ± 0.910 | 48 | 48 | **2.59e-04** | -0.86 |
| D45 | 1300–1500 cm⁻¹ (CH₂/CH₃ bending) | 0.361 ± 0.042 | 0.453 ± 0.056 | 48 | 38 | **9.00e-11** | -1.91 |
|  | 1600–1800 cm⁻¹ (Amide I / protein) | 0.178 ± 0.041 | 0.266 ± 0.042 | 48 | 38 | **2.49e-11** | -2.11 |
|  | 2800–3000 cm⁻¹ (CH stretching / lipid) | 0.508 ± 0.023 | 0.534 ± 0.013 | 48 | 38 | **3.72e-07** | -1.33 |
|  | 2800–3000/1600–1800 (lipid/protein ratio) | 3.010 ± 0.713 | 2.066 ± 0.359 | 48 | 38 | **1.13e-10** | 1.62 |
| Mature | 1300–1500 cm⁻¹ (CH₂/CH₃ bending) | 0.753 ± 0.055 | 0.424 ± 0.083 | 48 | 59 | **7.56e-19** | 4.59 |
|  | 1600–1800 cm⁻¹ (Amide I / protein) | 0.687 ± 0.058 | 0.323 ± 0.070 | 48 | 59 | **7.56e-19** | 5.60 |
|  | 2800–3000 cm⁻¹ (CH stretching / lipid) | 0.591 ± 0.026 | 0.450 ± 0.021 | 48 | 59 | **7.56e-19** | 6.02 |
|  | 2800–3000/1600–1800 (lipid/protein ratio) | 0.866 ± 0.061 | 1.449 ± 0.258 | 48 | 59 | **1.40e-18** | -2.97 |

**Supplementary Table S2. Raman peak positions in the protein spectral regions of mature wild-type (WT, SC8) and RDEB fibroblasts.**

Summary of mature-stage peak positions for protein-associated Raman bands used in the peak-shift analysis. Suggested columns: Raman Band; Biochemical Assignment; WT (cm⁻¹); RDEB (cm⁻¹); Shift (cm⁻¹); p-value.

| **Raman band** | **Biochemical assignment** | **WT (cm⁻¹)** | **RDEB (cm⁻¹)** | **Shift (cm⁻¹)** | **p-value** | **Sig.** |
| --- | --- | --- | --- | --- | --- | --- |
| **1300–1500 cm⁻¹ region (protein backbone)** | | | | | | |
| Phenylalanine (~1004 cm⁻¹) | *Phe ring breathing (protein marker)* | 1005.2 ± 0.7 | 1005.7 ± 1.0 | **+0.5** | **= 0.005** | ****** |
| Amide III (~1240 cm⁻¹) | *C–N stretch + N–H bend (β-sheet / collagen)* | 1259.4 ± 6.2 | 1258.8 ± 12.5 | -0.6 | = 0.180 | ns |
| CH₂ wagging (~1340 cm⁻¹) | *Collagen-specific CH₂ wagging* | 1331.1 ± 6.9 | 1322.0 ± 2.8 | **-9.2** | **< 0.001** | ******* |
| **1600–1800 cm⁻¹ region (protein secondary structure)** | | | | | | |
| Amide II (~1550 cm⁻¹) | *N–H bend + C–N stretch (protein 2° structure)* | 1577.2 ± 3.6 | 1578.1 ± 2.8 | +1.0 | = 0.099 | ns |
| Tyr/Phe (~1615 cm⁻¹) | *Tyr / Phe ring C=C stretch* | 1620.4 ± 4.9 | 1618.1 ± 6.5 | -2.3 | = 0.148 | ns |
| Amide I (~1650 cm⁻¹) | *C=O stretch (α-helix / β-sheet)* | 1661.0 ± 1.9 | 1658.7 ± 2.1 | **-2.3** | **< 0.001** | ******* |
| **2800–3000 cm⁻¹ region (aliphatic CH stretch)** | | | | | | |
| CH₂ sym. (~2850 cm⁻¹) | *CH₂ symmetric stretch (lipid)* | 2869.7 ± 0.0 | 2869.0 ± 2.8 | -0.7 | = 0.069 | ns |
| CH₂/CH₃ (~2930 cm⁻¹) | *CH₂/CH₃ mixed stretch (protein/lipid)* | 2932.0 ± 1.4 | 2954.0 ± 0.0 | **+22.1** | **< 0.001** | ******* |
| CH₃ asym. (~2960 cm⁻¹) | *CH₃ asymmetric stretch (lipid)* | 2951.6 ± 0.0 | 2977.6 ± 1.3 | **+26.0** | **< 0.001** | ******* |
| n_WT = 48; n_RDEB = 59 for all Mature comparisons. Shift = RDEB − WT (cm⁻¹). Significance: *p < 0.05, **p < 0.01, ***p < 0.001; ns, not significant (Mann–Whitney U, two-sided). | | | | | | |
